# Supplementary material for: Maternal Milk Provision in the Neonatal Intensive Care Unit and Mother–Infant Emotional Connection for Preterm Infants
Source: MDPI journal article supplement (doi:10.3390/children9020296), 2022-02-21
Supplement: s1 [file s1]

**Supplemental Table 2. Parenting in the NICU Study Survey. Four latent variables and corresponding factor loadings**

| Rotated Factor Pattern |                                                                          | Factor1      | Factor2       | Factor3       | Factor4       | Final<br>Communality<br>Estimates<br>(h <sup>2</sup> ) |
|------------------------|--------------------------------------------------------------------------|--------------|---------------|---------------|---------------|--------------------------------------------------------|
| nv_signl               | Can tell from baby non-verbal signs when needs help/support              | <b>0.678</b> | -0.162        | 0.108         | 0.137         | 0.516                                                  |
| bby_aln                | Good at knowing when baby needs to be left alone                         | <b>0.643</b> | -0.335        | 0.132         | -0.073        | 0.549                                                  |
| wthdrw                 | When baby crying/upset, I do not withdraw from relationship              | <b>0.235</b> | 0.047         | 0.054         | -0.110        | 0.072                                                  |
| read_nd                | Good at ready/interpreting baby's needs                                  | <b>0.944</b> | -0.119        | 0.055         | -0.026        | 0.909                                                  |
| unstld                 | Uncomfortable when baby unsettled/demanding                              | -0.261       | <b>0.350</b>  | -0.189        | 0.342         | 0.343                                                  |
| bby_cry                | Can tell what is upsetting baby by his/her cry                           | <b>0.513</b> | -0.333        | 0.024         | 0.154         | 0.398                                                  |
| precious               | Feel child is terribly precious                                          | 0.062        | <b>-0.265</b> | 0.072         | 0.088         | 0.087                                                  |
| tch_bby                | Want to touch/hold baby when I see him/her                               | -0.048       | 0.018         | <b>0.843</b>  | 0.109         | 0.725                                                  |
| care_fun               | Taking care of baby is fun                                               | 0.259        | -0.005        | <b>0.612</b>  | -0.266        | 0.512                                                  |
| do_nythg               | Willing to do anything for child                                         | 0.419        | -0.181        | <b>0.540</b>  | -0.213        | 0.545                                                  |
| miss_tch <sup>1</sup>  | Miss touching/holding baby when not with me                              | 0.053        | -0.185        | <b>-0.765</b> | 0.046         | 0.625                                                  |
| peace                  | At peace when child nearby                                               | 0.173        | -0.236        | <b>0.460</b>  | -0.104        | 0.309                                                  |
| enjoy_int              | Enjoy interacting w/baby                                                 | 0.128        | -0.216        | <b>0.395</b>  | -0.104        | 0.230                                                  |
| wrry_wys <sup>1</sup>  | Worry about my child in many ways when child not w/me                    | -0.019       | <b>-0.208</b> | -0.204        | -0.055        | 0.088                                                  |
| nt_intsd <sup>1</sup>  | Not that interested in child                                             | -0.107       | -0.059        | 0.027         | <b>-0.455</b> | 0.223                                                  |
| spk2bby                | Speak to baby when caring fo0r him/her                                   | 0.020        | -0.059        | -0.033        | <b>0.119</b>  | 0.019                                                  |
| ftr_anx                | Thinking of future makes anxious about whether can be parent child needs | -0.249       | <b>0.532</b>  | -0.039        | 0.150         | 0.369                                                  |
| scrs_tch               | Scares me to touch baby                                                  | -0.075       | 0.169         | -0.001        | <b>0.596</b>  | 0.389                                                  |
| dnk_int                | Don't know how to interact w/ baby                                       | -0.339       | 0.422         | -0.097        | <b>0.582</b>  | 0.641                                                  |
| trbl_own               | Trouble actually feeling like this baby is mine                          | -0.293       | <b>0.411</b>  | -0.271        | 0.327         | 0.436                                                  |
| wrry_sk                | Worry baby might get sick                                                | -0.027       | <b>0.409</b>  | 0.158         | 0.093         | 0.202                                                  |
| do4bby                 | Feel there is something more I should be doing for baby                  | -0.089       | <b>0.692</b>  | -0.038        | 0.060         | 0.492                                                  |
| dnk_2do                | Sometimes don't know what to do for baby                                 | -0.163       | <b>0.768</b>  | -0.123        | 0.160         | 0.658                                                  |
| hld_brk                | Feel holding baby could break him/her                                    | -0.362       | 0.341         | -0.054        | <b>0.440</b>  | 0.443                                                  |

<sup>1</sup> Items 'I worry about my child in many ways when my child is not with me', 'I miss touching or holding my baby when s/he is not with me', 'I am not that interested in my child', and 'I don't find my baby cute' were reverse coded.
