# Supplementary material for: Maternal Milk Provision in the Neonatal Intensive Care Unit and Mother–Infant Emotional Connection for Preterm Infants
Source: Children (Basel). 2022 Feb 21;9(2):296. doi: 10.3390/children9020296 (PMC8870821; doi:10.3390/children9020296)
Supplement: Supplementary file 1 [file children-09-00296-s001.zip]

Archive with 4 entries (4 files):
- Description S1 Factor Analysis.pdf
- Figure S1 Scree Plot of Eigenvalues.pdf
- Table S1 Correlations.xlsx
- Table S2 Parenting in the NICU Study Survey. Four latent variables and corresponding factor loadings.pdf
