# Supplementary material for: Maternal Milk Provision in the Neonatal Intensive Care Unit and Mother–Infant Emotional Connection for Preterm Infants
Source: Children (Basel). 2022 Feb 21;9(2):296. doi: 10.3390/children9020296 (PMC8870821; doi:10.3390/children9020296)
Supplement: Supplementary file 1 [file children-09-00296-s001.zip › Table S1 Correlations.xlsx]

## Sheet: Sheet1
Supplemental Table 1. Correlations among the n = 25 items on the Parenting in the NICU Study Survey
		nv_signl	bby_aln	wthdrw	read_nd	unstld	bby_cry	precious	tch_bby	care_fun	do_nythg	miss_tch	peace	enjy_int	wrry_wys	nt_intsd	spk2bby	bby_cute	ftr_anx	scrs_tch	dnk_int	trbl_own	wrry_sk	do4bby	dnk_2do	hld_brk		Legend
nv_signl	Can tell from baby non-verbal signs when needs help/support																											0.80-1.0
bby_aln	Good at knowing when baby needs to be left alone	0.60864																										0.70-0.79
wthdrw	When baby crying/upset, I do not withdraw from relationship	0.10906	0.19977																									0.60-0.69
read_nd	Good at ready/interpreting baby’s needs	0.66144	0.64338	0.20251																								0.50-0.59
unstld	Uncomfortable when baby unsettled/demanding	-0.15312	-0.31607	-0.01664	-0.32517																							0.35-0.49
bby_cry	Can tell what is upsetting baby by his/her cry	0.41832	0.34735	0.11158	0.53349	-0.17883																						0.20-0.34
precious	Feel child is terribly precious	0.1529	0.24428	-0.0003	0.06693	0.0425	0.04662																					0.01-0.19
tch_bby	Want to touch/hold baby when I see him/her	0.11817	0.03668	0.00286	-0.00711	-0.08207	0.0203	0.07347																				<0
care_fun	Taking care of baby is fun	0.19355	0.32943	0.19707	0.28246	-0.27225	0.08373	0.08132	0.43268
do_nythg	Willing to do anything for child	0.26095	0.46807	0.23946	0.45389	-0.28278	0.23883	0.23194	0.43262	0.51494
miss_tch1	Miss touching/holding baby when not with me	-0.01029	0.03066	0.01575	-0.02973	-0.14349	-0.05768	-0.03804	0.64321	0.53849	0.32029
peace	At peace when child nearby	0.18116	0.22085	0.03306	0.22074	-0.24807	0.14955	0.02075	0.43179	0.27835	0.46518	0.22968
enjy_int	Enjoy interacting w/baby	0.16855	0.15694	0.00407	0.17248	-0.20635	0.14737	0.02811	0.33846	0.36001	0.28649	0.18996	0.27995
wrry_wys1	Worry about my child in many ways when child not w/me	0.0099	-0.10184	0.00566	0.01693	-0.13656	-0.10429	-0.13859	0.10084	0.15494	0.02298	0.32032	-0.11677	0
nt_intsd1	Not that interested in child	0.05816	0.03858	0.01635	0.07898	0.08113	0.14858	0.04377	0.02179	-0.10676	-0.06862	-0.07187	0.05047	0.03108	0.01179
spk2bby	Speak to baby when caring for him/her	0.06875	0.07284	0.09526	0.00565	-0.00608	0.04324	-0.05409	-0.02693	-0.05251	-0.04909	-0.05852	-0.06236	-0.03841	0.12016	0.03462
bby_cute1	Dont find baby cute	-0.13958	-0.04467	-0.35305	-0.10453	0.14309	-0.15024	-0.00626	-0.13348	-0.1249	-0.09283	-0.01403	-0.00319	-0.07262	0.09825	0.26811	-0.14647
ftr_anx	Thinking of future makes anxious about whether can be parent child needs	-0.24155	-0.34179	-0.15729	-0.29731	0.3801	-0.32654	-0.21144	0.02732	-0.22496	-0.1689	0.0527	-0.15898	-0.16065	0.02776	0.03497	-0.14718	0.2509
scrs_tch	Scares me to touch baby	-0.10667	-0.19549	0.01373	-0.0897	0.33221	-0.01031	0.05987	0.05068	-0.2625	-0.11851	0.04384	-0.12758	-0.16343	0.15732	0.27479	0.05426	0.0771	0.17822
dnk_int	Don’t know how to interact w/ baby	-0.23854	-0.39229	-0.14908	-0.39054	0.45529	-0.24251	-0.06516	-0.0282	-0.2133	-0.45538	0.033	-0.28923	-0.21261	0.11985	0.27168	0.0672	0.32086	0.4003	0.48235
trbl_own	Trouble actually feeling like this baby is mine	-0.20712	-0.2956	-0.09814	-0.36926	0.41053	-0.26241	0.00637	-0.1808	-0.27066	-0.35709	-0.13098	-0.30706	-0.47278	-0.01195	0.21836	-0.11968	0.21039	0.31517	0.23504	0.52045
wrry_sk	Worry baby might get sick	-0.02779	-0.13344	0.00826	-0.071	0.20777	-0.18056	-0.12521	0.12492	0.04037	-0.03171	0.23183	-0.04028	-0.09247	0.31046	-0.0109	0.18904	0.04788	0.21084	0.22468	0.18905	0.11245
do4bby	Feel there is something more I should be doing for baby	-0.15779	-0.34263	-0.02667	-0.16881	0.31603	-0.25194	-0.19339	0.01011	-0.09556	-0.18426	0.08955	-0.2013	-0.15857	0.05612	0.08151	-0.0562	0.03364	0.36045	0.15898	0.33391	0.37134	0.36866
dnk_2do	Sometimes don’t know what to do for baby	-0.22676	-0.39846	0.0534	-0.25463	0.41251	-0.33025	-0.18669	-0.04528	-0.16054	-0.30958	0.02271	-0.25168	-0.22605	0.09429	0.15348	-0.01798	0.08455	0.51812	0.18248	0.48431	0.46154	0.24501	0.57061
hld_brk	Feel holding baby could break him/her	-0.18706	-0.41968	-0.18962	-0.39783	0.30184	-0.21921	-0.25313	0.07431	-0.27763	-0.3602	-0.0203	-0.28125	-0.12668	0.15098	0.19681	0.09647	0.28504	0.37624	0.32211	0.50277	0.39958	0.16757	0.26264	0.41644
1.Items ‘I worry about my child in many ways when my child is not with me’, ‘I miss touching or holding my baby when s/he is not with me’, ‘I am not that interested in my child’, and ‘I don’t find my baby cute’ were reverse coded.
