# Supplementary figures and images for: Maternal Milk Provision in the Neonatal Intensive Care Unit and Mother–Infant Emotional Connection for Preterm Infants
Source: MDPI journal article supplement (doi:10.3390/children9020296), 2022-02-21

Supplemental Figure 1. Scree Plot of Eigenvalues

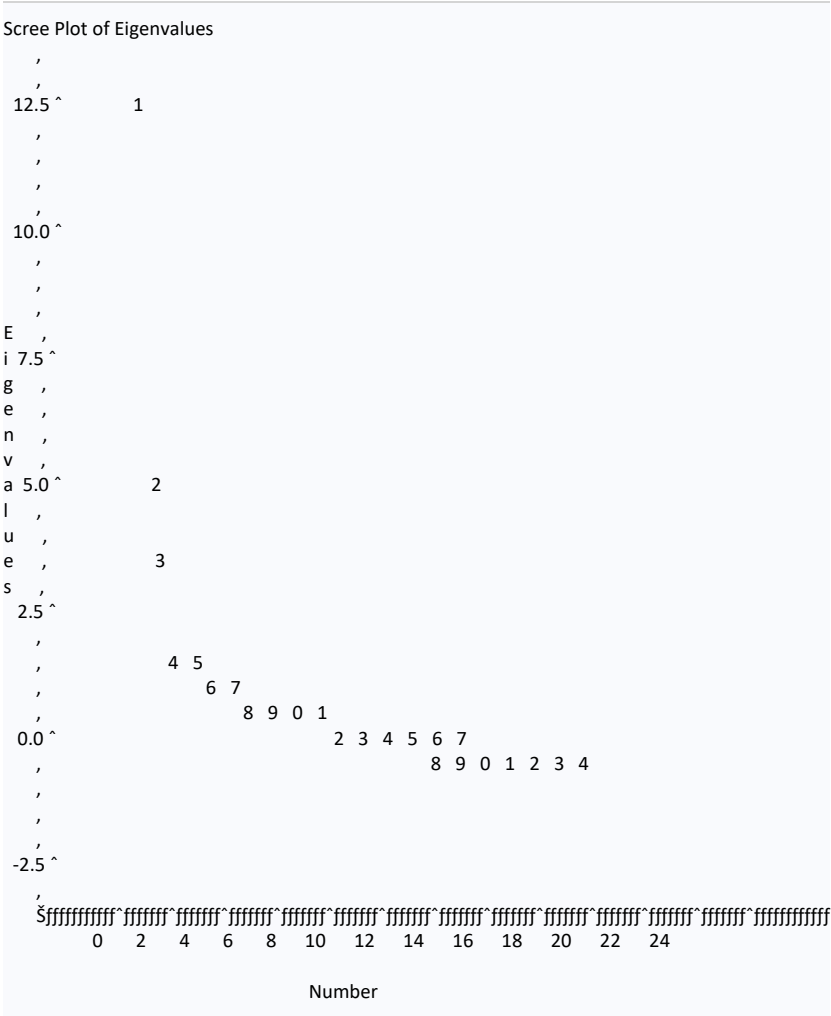

Supplement: s1 [file s1]
